# Supplementary material for: Tuning of the lowest excited states in mixed ruthenium(ii) polypyridyl complexes having RuN6 cores by the conformation of the ancillary ligand. Emission from a 3ligand-to-ligand-charge-transfer state
Source: Royal Society of Chemistry journal article supplement (doi:10.1039/c5nj03329b), 2016-01-01
Supplement: c5nj03329b1.pdf [file c5nj03329b1.pdf]

## Supplementary material

for

# Tuning of the lowest excited states in mixed ruthenium(II) polypyridyl complexes having RuN<sub>6</sub> cores by the conformation of the ancillary ligand. Emission from a <sup>3</sup>ligand-to-ligand-charge-transfer state

Nirmal K. Shee <sup>a</sup>, Michael G. B. Drew <sup>b</sup> and Dipankar Datta <sup>a,\*</sup>

**Table S1** Hydrogen bond dimensions in **1** and **2** (distances, Å; angles, °). A=acceptor, D = donor

|                        | H...A | D...A     | D-H...A | symmetry element   |
|------------------------|-------|-----------|---------|--------------------|
| <b>In 1</b>            |       |           |         |                    |
| O(1)- H(1W)... N(63)   | 2.13  | 2.901(8)  | 150     | 1+x,y,z            |
| O(1)- H(2W)... O(85)   | 2.29  | 3.151(13) | 177     |                    |
| O(1)- H(2W)... O(81)   | 2.56  | 3.420(12) | 175     |                    |
| N(63)- H(63A)... O(87) | 2.20  | 3.021(9)  | 161     | -1/2+x, 1.5-y, 2-z |
| N(63)- H(63A)... O(84) | 2.52  | 3.342(8)  | 161     | -1/2+x, 1.5-y, 2-z |
| N(63)- H(63B)... O(88) | 2.11  | 2.906(9)  | 154     | -1+x, y,z          |
| N(63)- H(63B)... O(83) | 2.41  | 3.158(8)  | 146     | -1+x,y,z           |
| N(73)- H(73B)... O(74) | 2.40  | 3.118(5)  | 142     | 1.5-x, y-1/2, z    |

## In 2

|                        |      |           |     |              |
|------------------------|------|-----------|-----|--------------|
| N(73)- H(73A)... O(1)  | 2.20 | 2.935(10) | 143 |              |
| N(73)- H(73B)... N(63) | 2.36 | 3.144(11) | 152 | 1+x, y, z    |
| N(63)- H(63B)... O(72) | 2.33 | 2.942(11) | 128 |              |
| O(1)- H(1W)... O(2)    | 2.09 | 2.91(3)   | 159 | 1-x, -y, 2-z |
| O(1)- H(2W)... O(71)   | 2.22 | 2.940(10) | 140 | 1-x, -y, 1-z |
| O(2)- H(4W)... O(74)   | 2.47 | 3.30(2)   | 168 | x,y,1+z      |

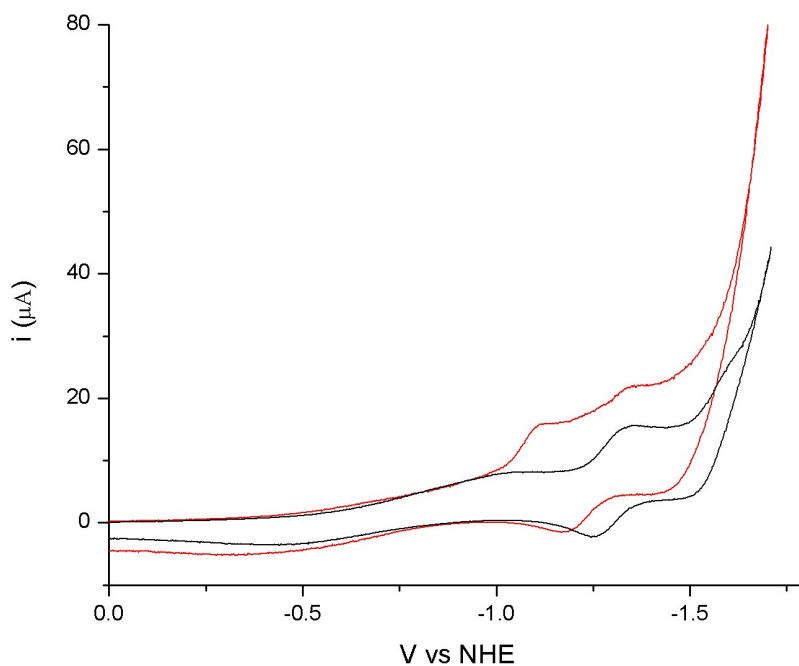

**Fig. S1** Cyclic voltammograms (CV)'s of **1** (black) and **2** (red) in acetonitrile 0.1 mol dm<sup>-3</sup> in TEAP at a Pt electrode on the negative side of NHE. Scan rate = 50 mV s<sup>-1</sup>. Solute concentration = 1 mmol dm<sup>-3</sup>.

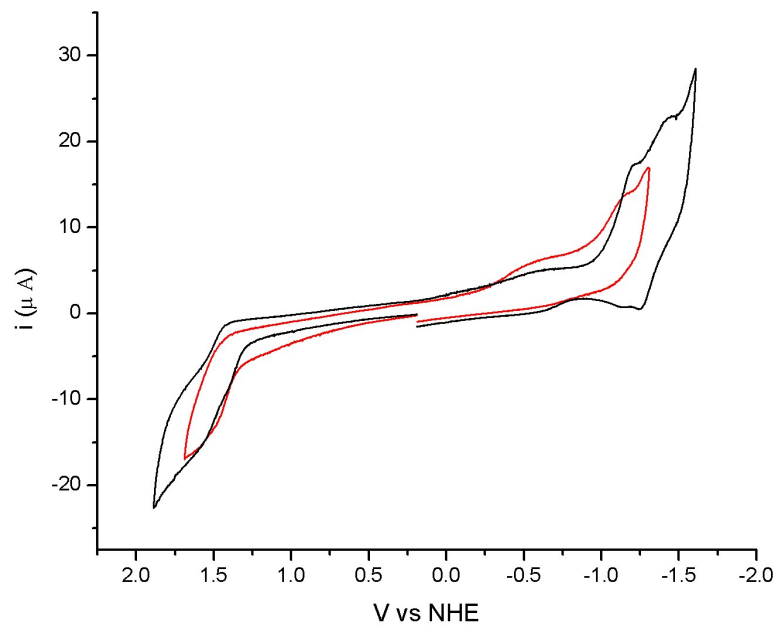

**Fig. S2** CV's of **1** (black) and **2** (red) in acetonitrile  $0.1 \text{ mol dm}^{-3}$  in TEAP at a glassy carbon electrode. Scan rate =  $50 \text{ mV s}^{-1}$ . Solute concentration =  $1 \text{ mmol dm}^{-3}$ .

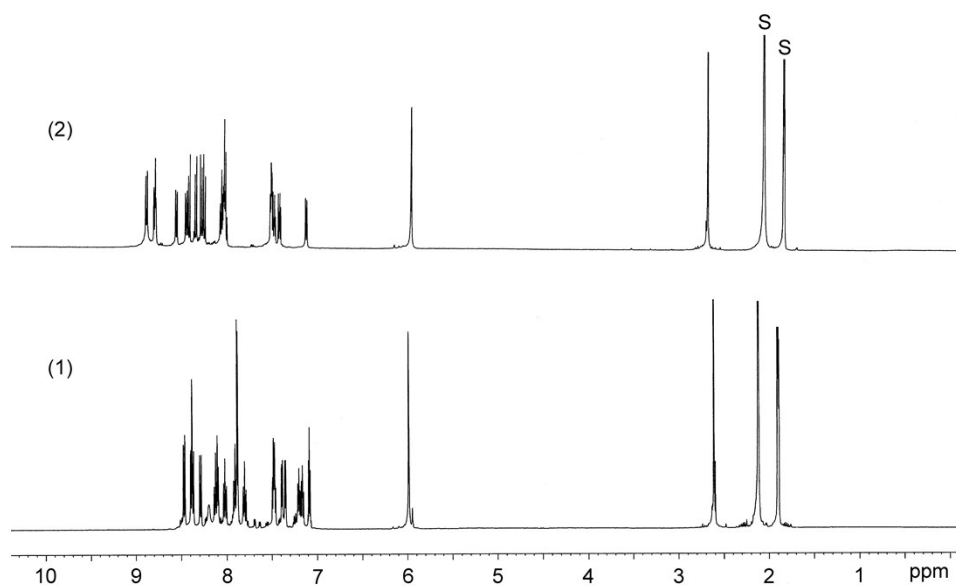

**Fig. S3**  $^1\text{H}$  NMR of **(1)** and **(2)** in  $\text{CD}_3\text{CN}$  at room temperature. Peaks marked by asterisks are due to the solvent.

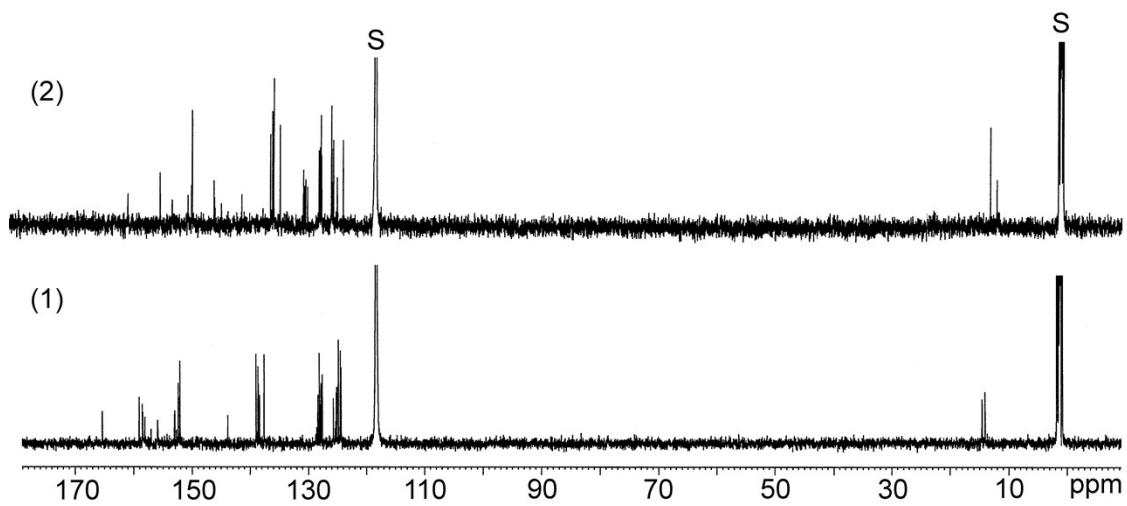

**Fig. S4**  $^{13}\text{C}$  NMR of (1) and (2) in  $\text{CD}_3\text{CN}$  at room temperature. Peaks marked by asterisks are due to the solvent.
